# Supplementary material for: Characterization of NaxLi0.67+yNi0.33Mn0.67O2 as a positive electrode material for lithium-ion batteries
Source: Royal Society of Chemistry journal article supplement (doi:10.1039/c8ra03889a), 2018-01-01
Supplement: c8ra03889a1.pdf [file c8ra03889a1.pdf]

## Electronic Supplementary Information

### Characterization of $\text{Na}_x\text{Li}_{0.67+y}\text{Ni}_{0.33}\text{Mn}_{0.67}\text{O}_2$ as a Positive Electrode Material for Lithium-ion Batteries

Kazuki Chiba<sup>a,b</sup>, Masahiro Shikano<sup>\*a</sup>, Hikari Sakaeb<sup>a</sup>

<sup>a</sup>Research Institute of Electrochemical Energy, National Institute of Advanced Industrial Science and Technology (AIST), Ikeda, Osaka 563-8577, Japan

<sup>b</sup>Office of Society-Academia Collaboration for Innovation, Kyoto University, Uji, Kyoto 611-0011, Japan

**Table S1** Spinel and layer structure content of Sample015, Sample019 and Sample027.

| <b>Sample</b>                                                                                                   | <b>Spinel</b> | <b>Layer</b> |
|-----------------------------------------------------------------------------------------------------------------|---------------|--------------|
| <b>Sample027</b><br><b>(Na<sub>0.013</sub>Li<sub>0.86</sub>Ni<sub>0.33</sub>Mn<sub>0.67</sub>O<sub>2</sub>)</b> | 7 %           | 93 %         |
| <b>Sample019</b><br><b>(Na<sub>0.012</sub>Li<sub>0.87</sub>Ni<sub>0.33</sub>Mn<sub>0.67</sub>O<sub>2</sub>)</b> | 21 %          | 79 %         |
| <b>Sample015</b><br><b>(Na<sub>0.010</sub>Li<sub>0.83</sub>Ni<sub>0.33</sub>Mn<sub>0.67</sub>O<sub>2</sub>)</b> | 31 %          | 69 %         |

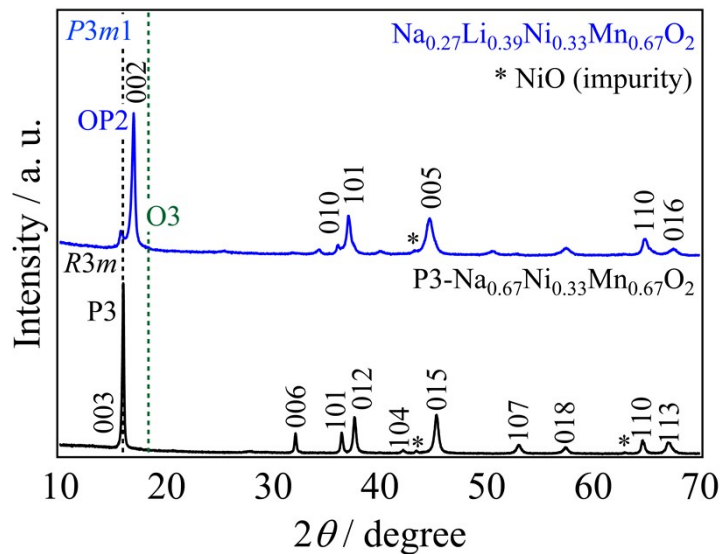

**Fig. S1** XRD patterns of  $\text{P3-Na}_{0.67}\text{Ni}_{0.33}\text{Mn}_{0.67}\text{O}_2$  and  $\text{Na}_{0.27}\text{Li}_{0.39}\text{Ni}_{0.33}\text{Mn}_{0.67}\text{O}_2$  before heat treatment.

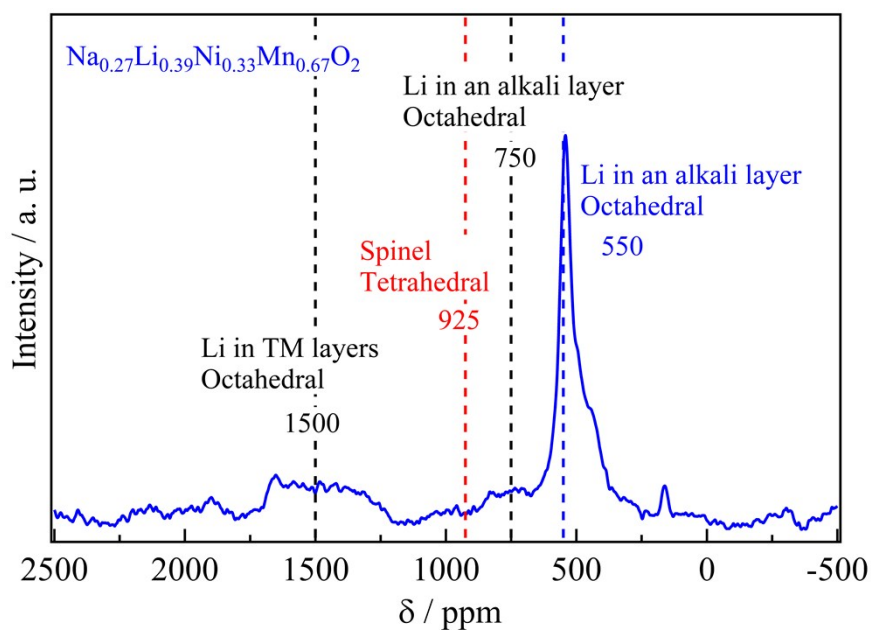

**Fig. S2**  $^6\text{Li}$ -MAS-NMR spectrum of  $\text{Na}_{0.27}\text{Li}_{0.39}\text{Ni}_{0.33}\text{Mn}_{0.67}\text{O}_2$  before heat treatment measured at room temperature.

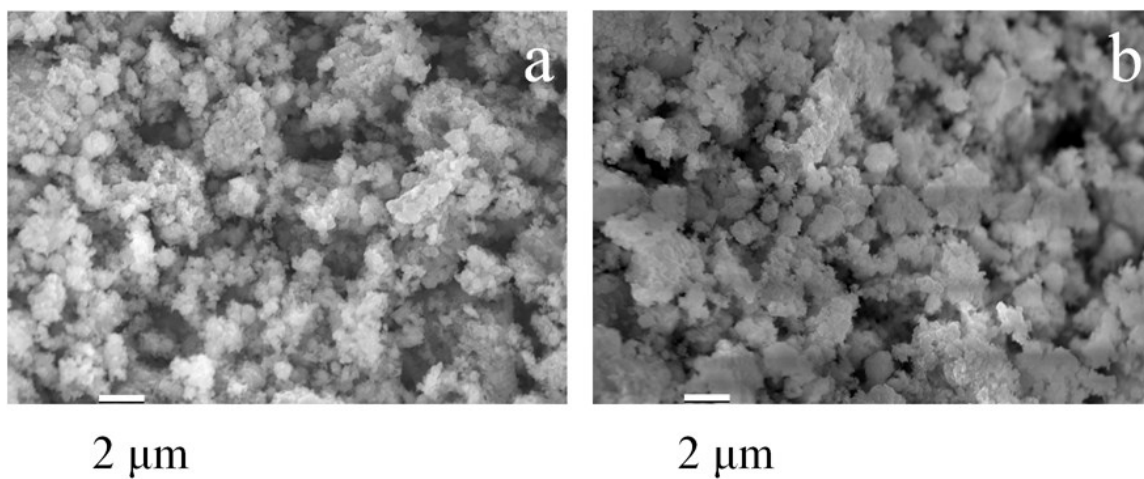

**Fig. S3** SEM images of (a) before chemical lithiation and (b) after chemical lithiation (sample015).

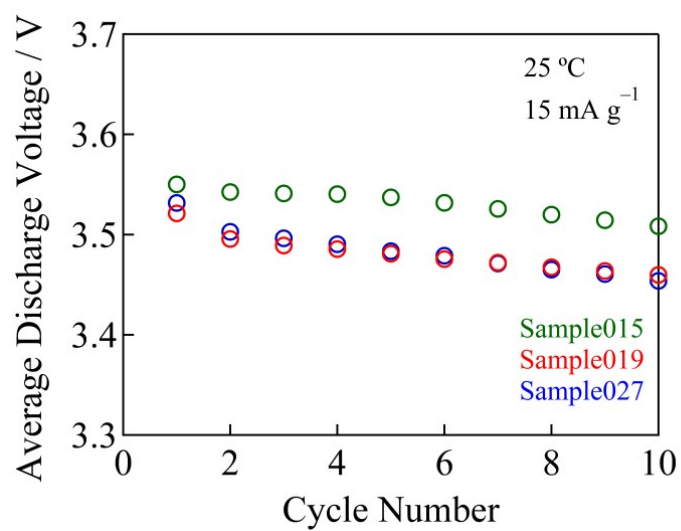

**Fig. S4** Average discharge voltage upon cycling of Sample015, Sample019 and Sample027.
